# Supplementary material for: Testing Pollen of Single and Stacked Insect-Resistant Bt-Maize on In vitro Reared Honey Bee Larvae
Source: PLOS journal article supplement (doi:10.1371/journal.pone.0028174), 2011-12-16
Supplement: S3 (10.1371/journal.pone.0028174.s003) [file journal.pone.0028174.s003]

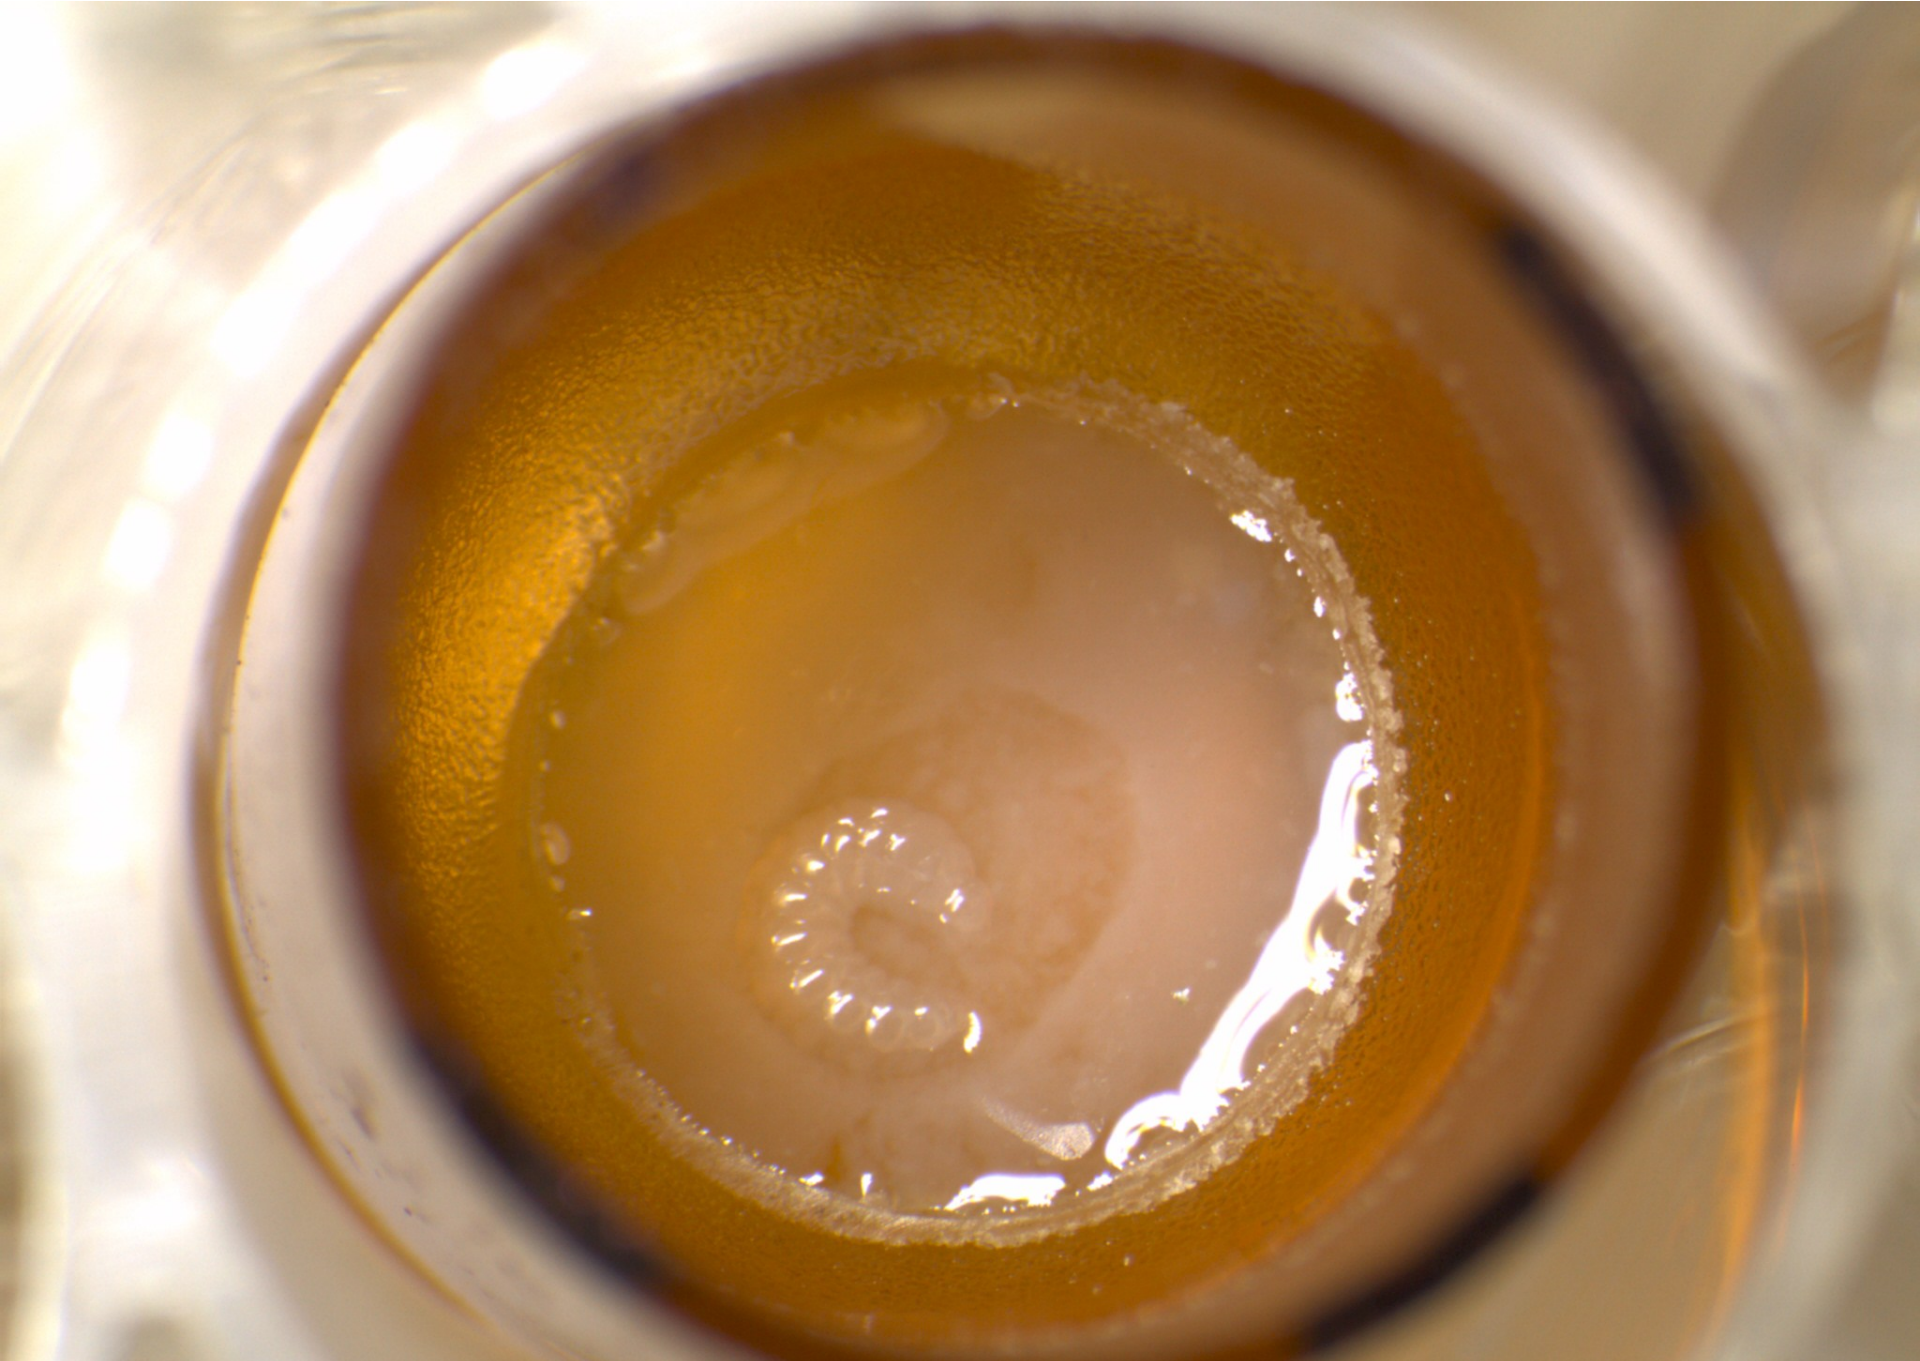

Second instar honey bee larvae reared *in vitro*



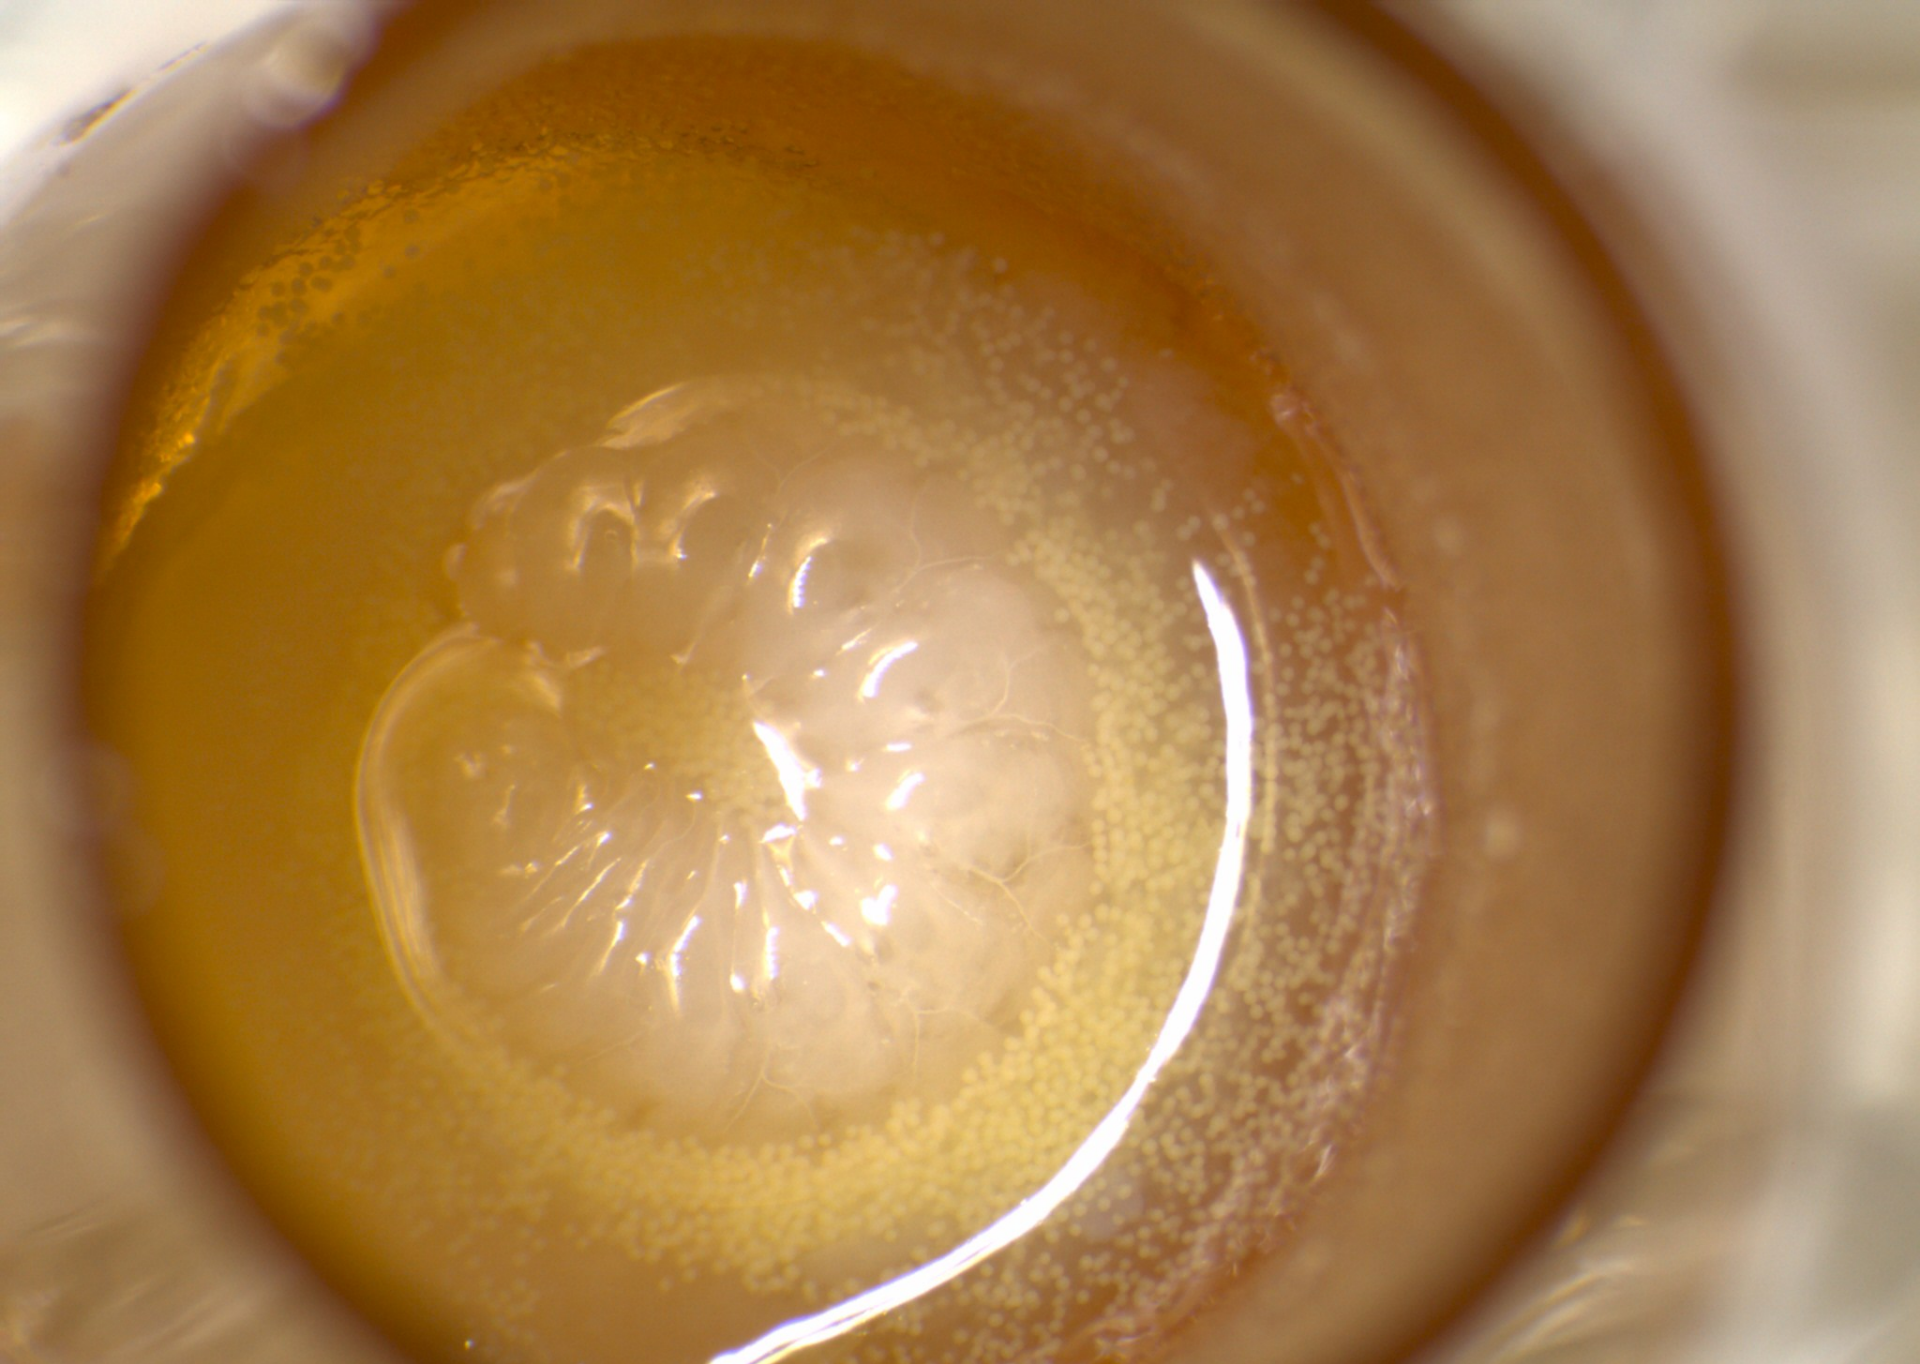

Forth instar honey bee larvae, feeding on maize pollen within the semi-artificial diet

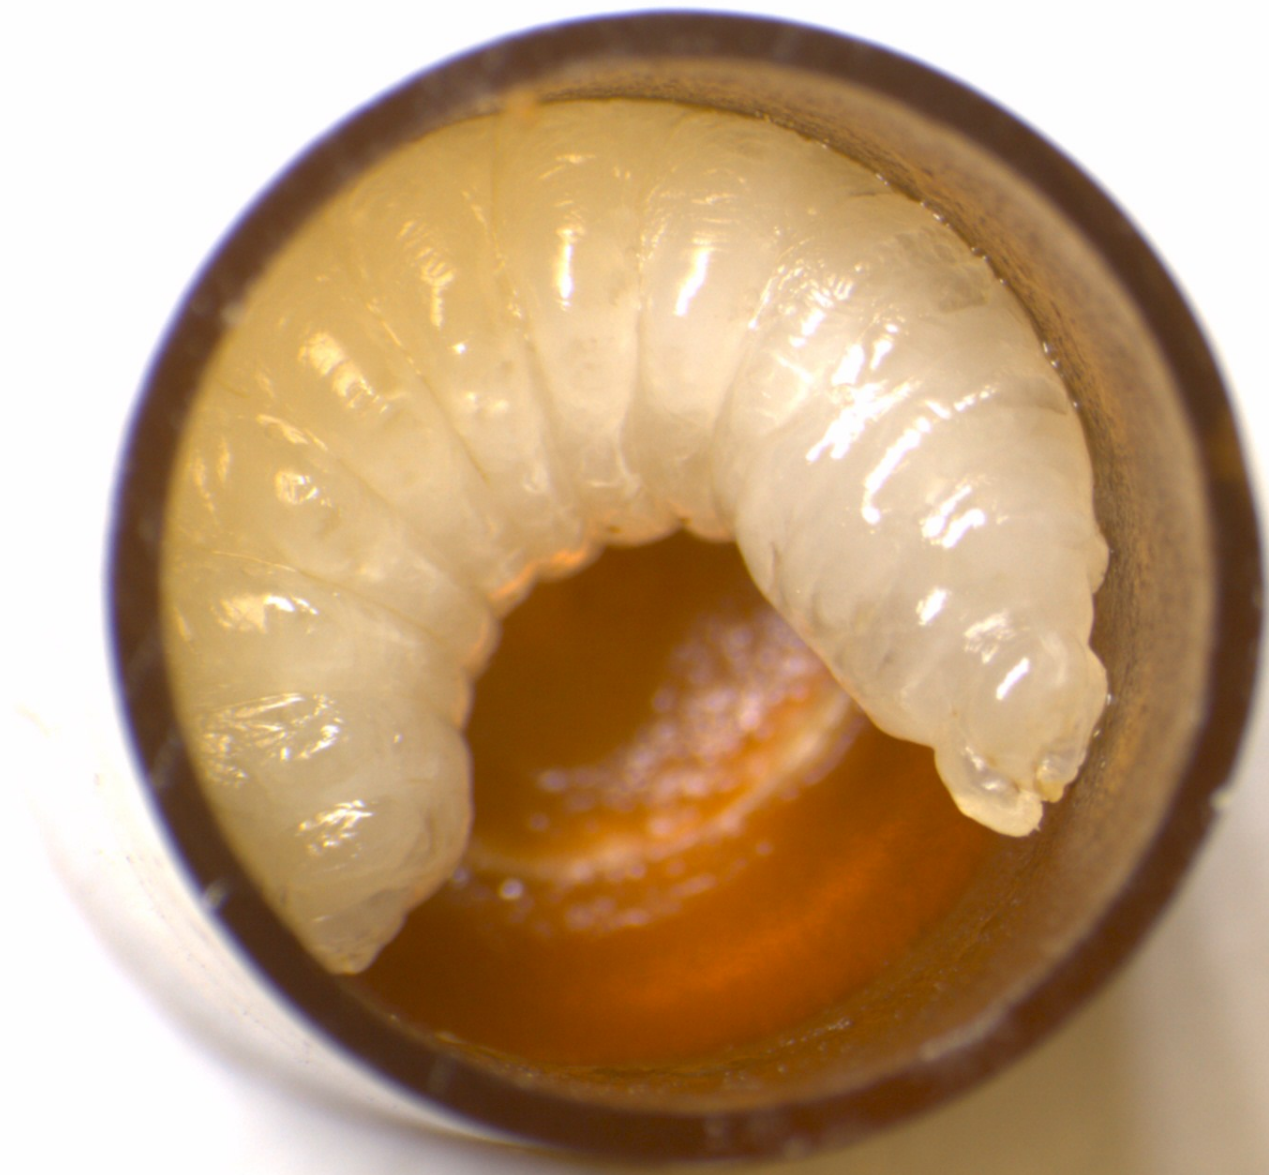

Larva finished feeding; Prepupal stage. Endpoint: weight and survival



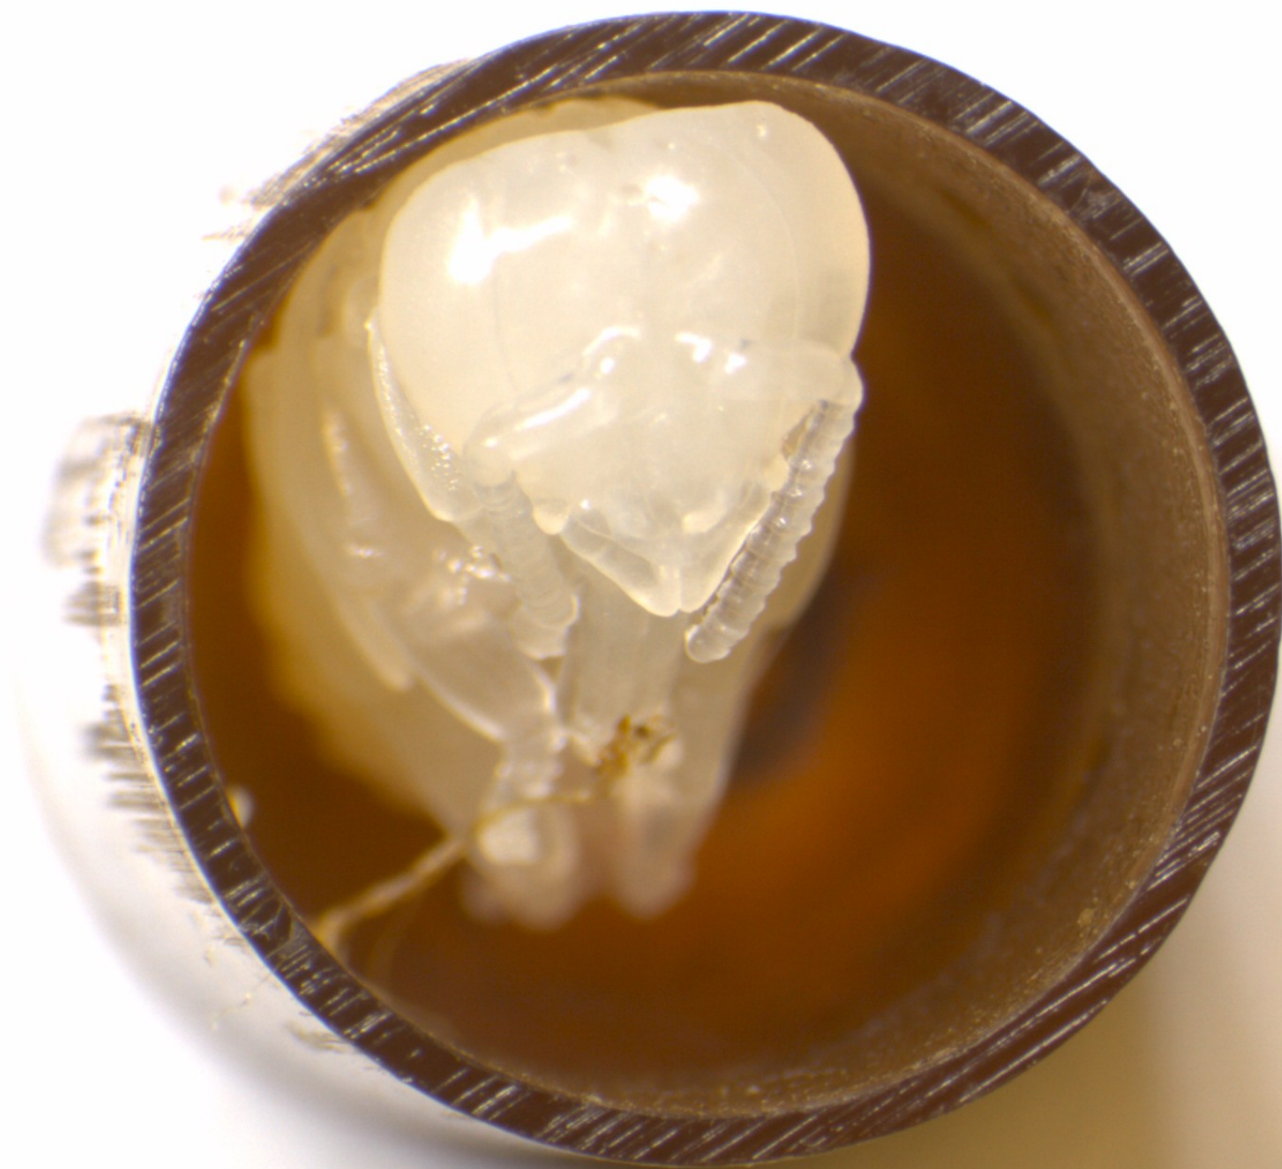

A honey bee pupae *in vitro*



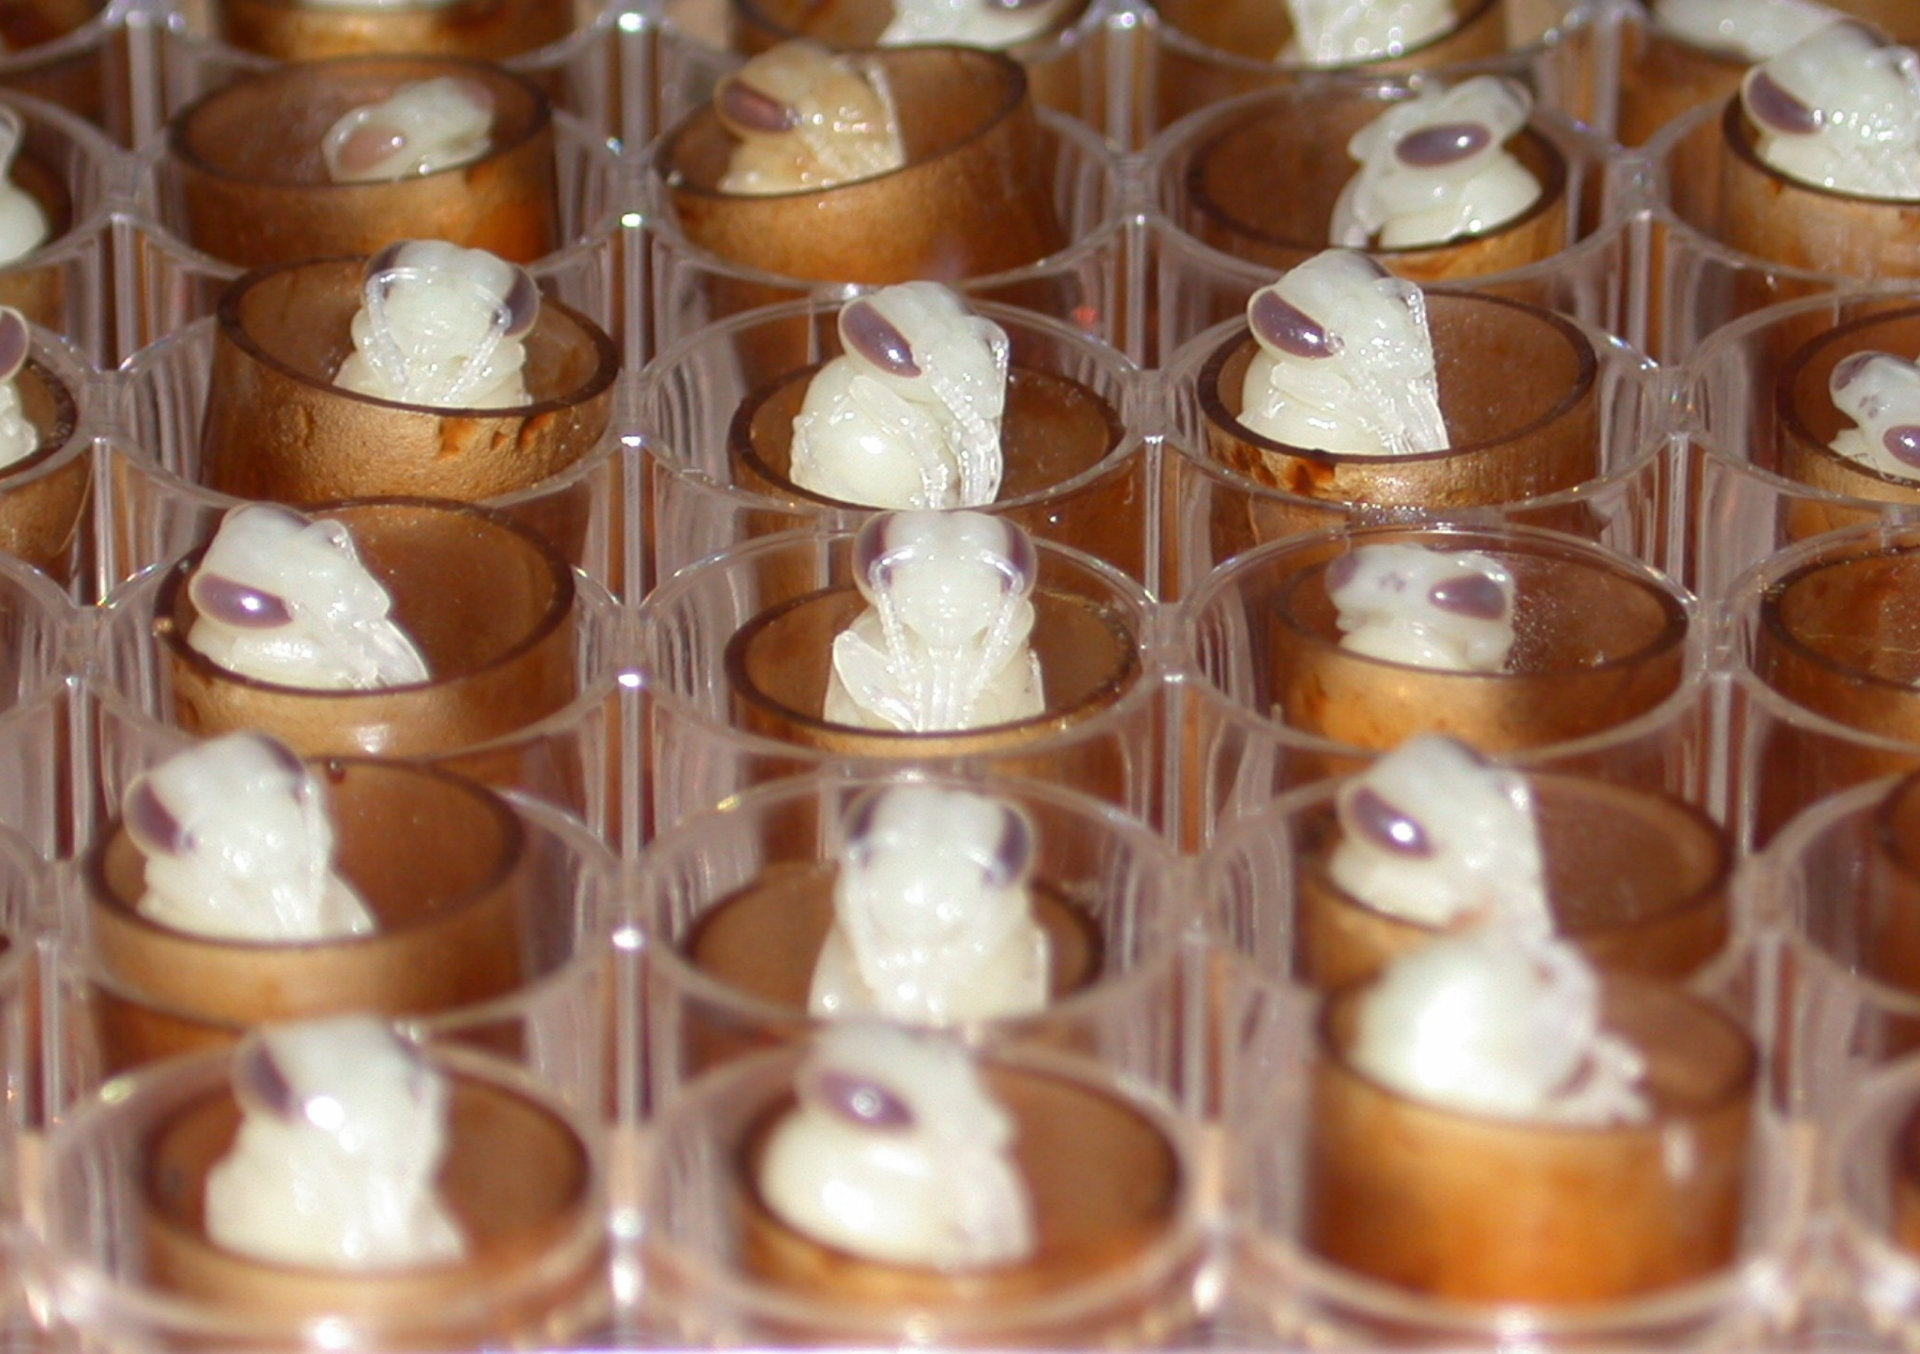

Honey bee pupae *in vitro*, almost at full development



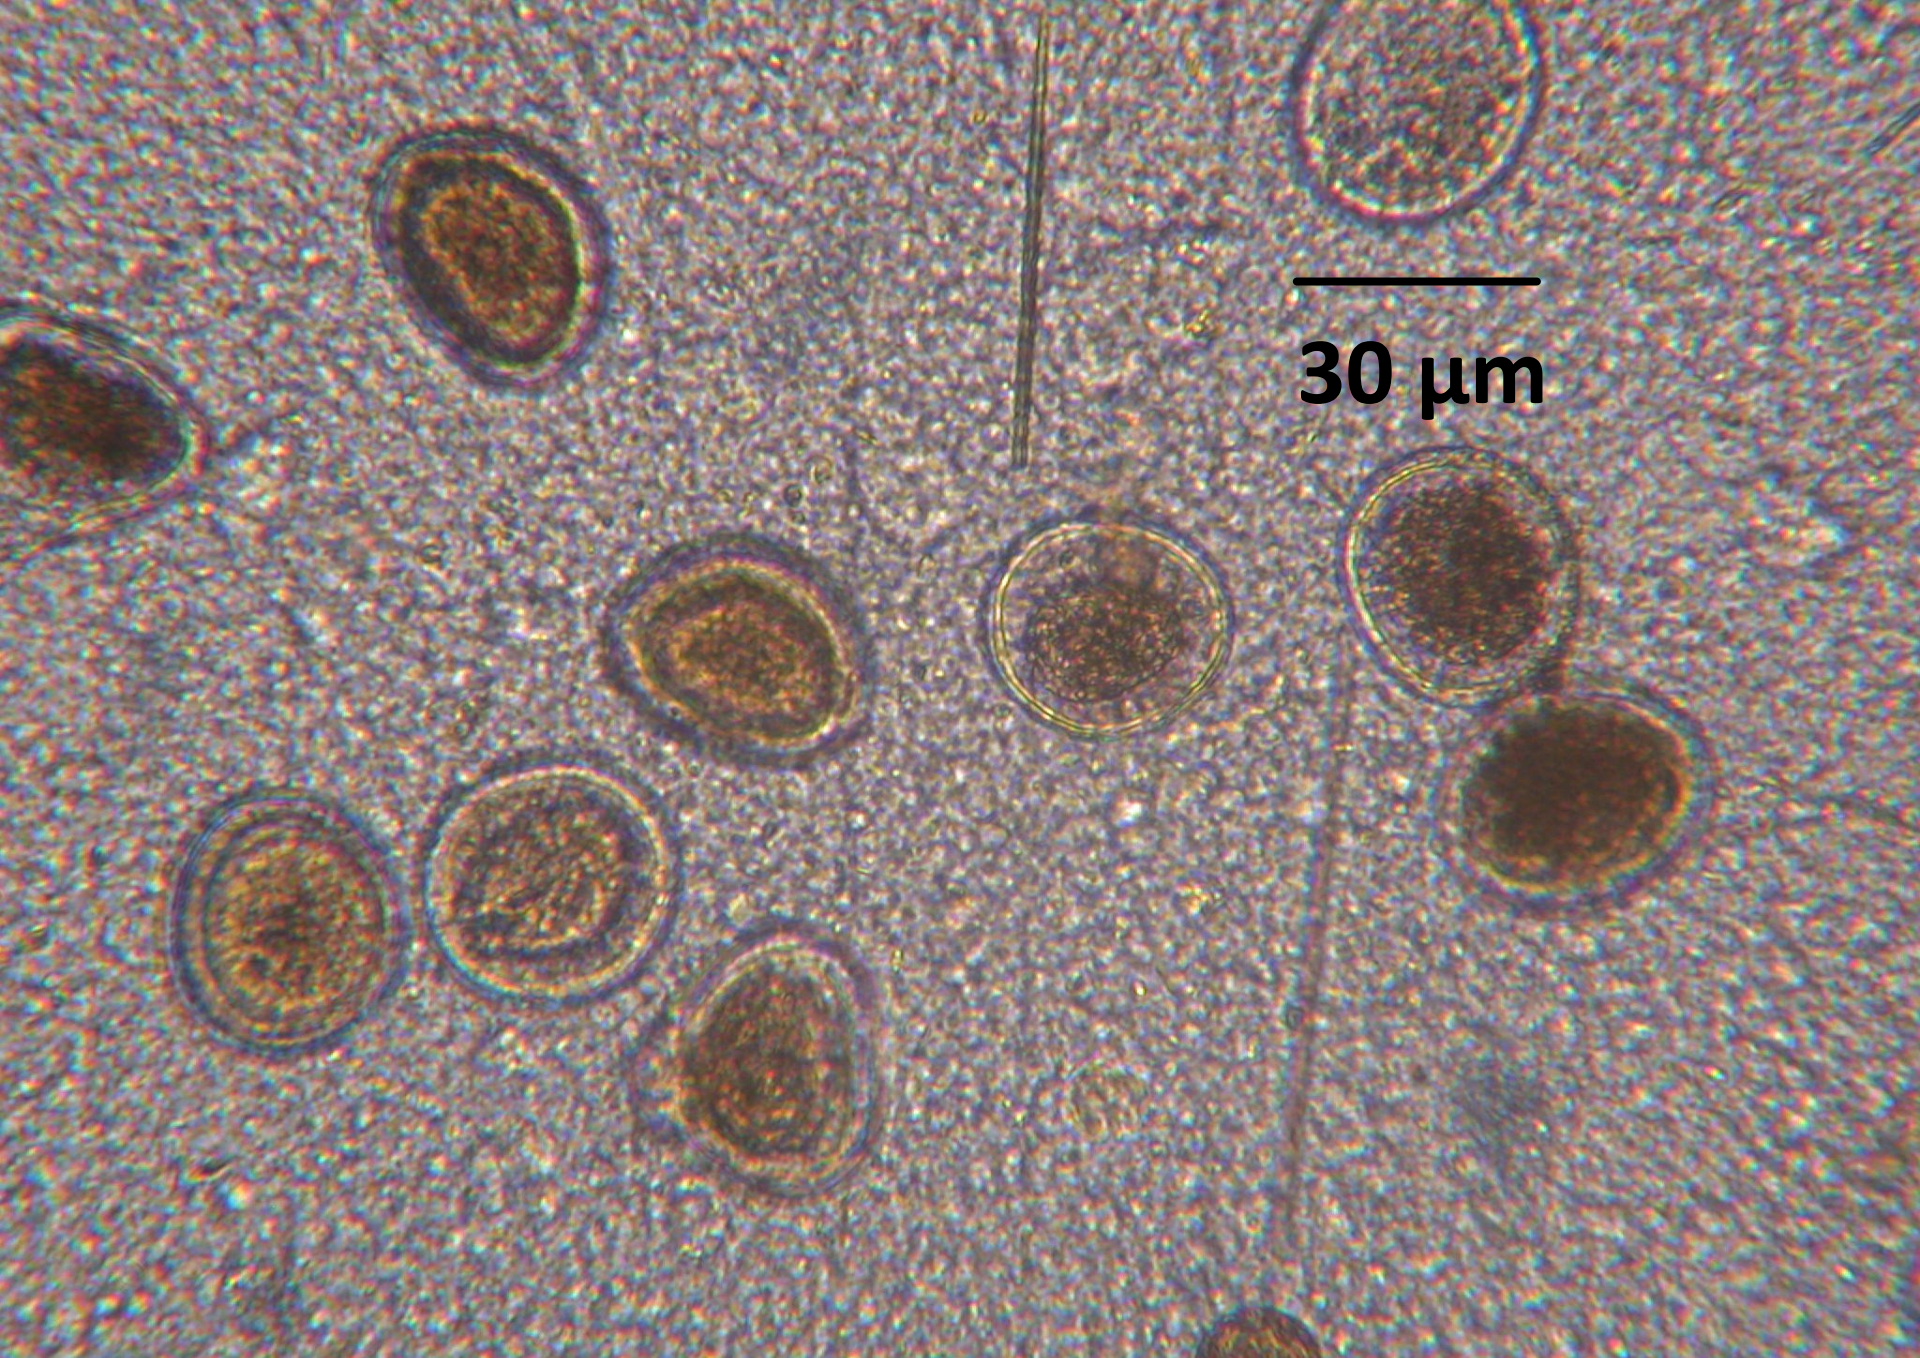

30  $\mu\text{m}$

*Heliconia rostrata* pollen (toxic control); as added within the diet of larvae



70  $\mu\text{m}$

---

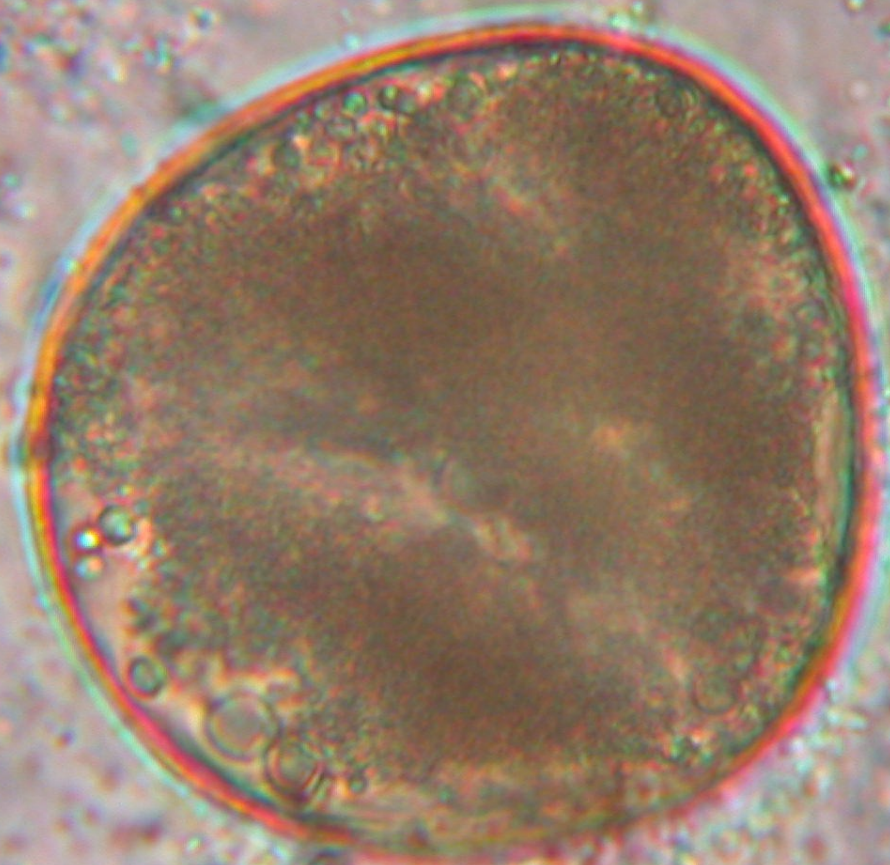

Maize pollen, as added within the diet of larvae



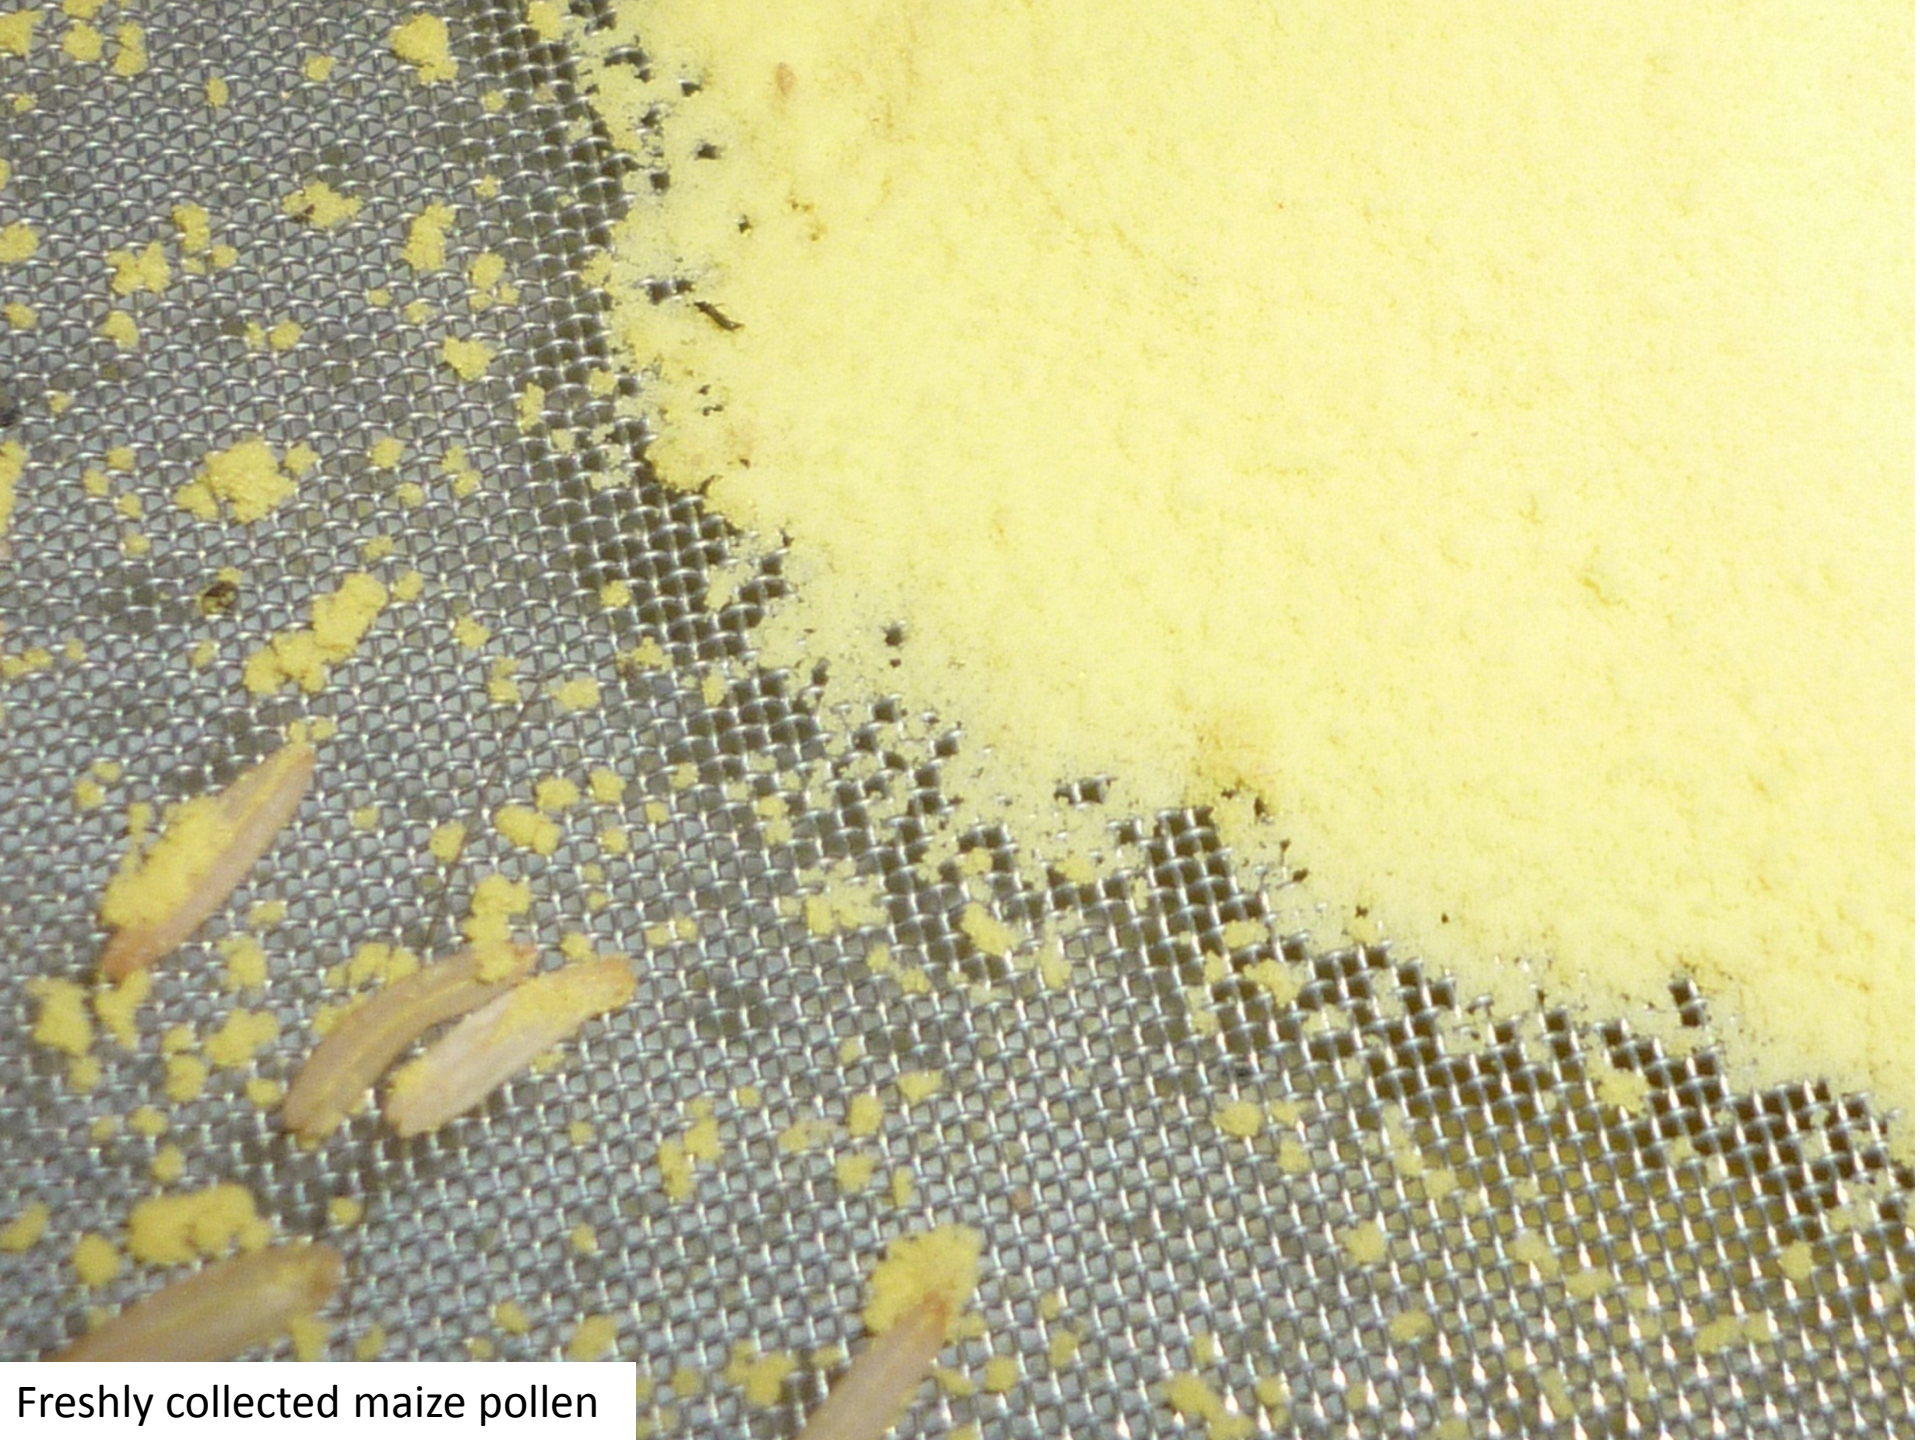

Freshly collected maize pollen
